# Supplementary material
Source: publisher figshare collection journal article supplement (https://tandf.figshare.com/ndownloader/files/15136844)
Supplement: Supplementary file 1 [file 15136844]

## Sheet: Sheet2
		Supplemental materials
		Annex 1
		Nutrient uptake into crop parts by nutrient element, crop and year. All data in kg ha-1.
		Abbreviations se below
				Cassava	Cassava	Cassava	Cassava	Cassava	Cassava	Cassava	Cassava	Cassava	Cassava	Cassava	Cassava	Cassava	Cassava	Cassava	Groundnuts	Groundnuts	Groundnuts	Groundnuts	Groundnuts	Groundnuts	Groundnuts	Groundnuts	Groundnuts	Groundnuts	Maize	Maize	Maize	Maize	Maize	Maize	Maize	Maize	Maize	Maize
Plot	Year	Species	Rep	Leaf_N	Leaf_Ca	Leaf_Mg	Leaf_K	Leaf_P	Stem_N	Stem_Ca	Stem_Mg	Stem_K	Stem_P	Root_N	Root_Ca	Root_Mg	Root_K	Root_P	Grain_N	Grain_Ca	Grain_Mg	Grain_K	Grain_P	Straw_N	Straw_Ca	Straw_Mg	Straw_K	Straw_P	Grain_N	Grain_Ca	Grain_Mg	Grain_K	Grain_P	Straw_N	Straw_Ca	Straw_Mg	Straw_K	Straw_P
2	1998	Control	1	19.1158	10.4817	2.25116	8.6544	1.80873	42.2735	33.2846	14.7291	46.5299	6.96628	19.3645	5.61033	3.02363	44.943	6.7261	15.9755	0.13441	0.58493	2.1079	1.20823	25.5973	22.2744	5.75556	43.1596	1.96339	31.3138	5.594e-05	2.70406	11.1807	7.62694	31.7696	14.4773	8.4817	90.2758	5.10948
8	1998	Control	2	21.5198	10.3584	2.1771	12.637	1.96095	24.2604	20.0638	9.5267	42.3048	3.6898	14.9719	5.20699	2.66094	46.5694	4.8637	18.8803	0.18789	0.84603	2.85466	1.57569	30.2362	21.3057	5.84356	42.8622	1.85868	24.7051	0	1.84711	7.9149	5.4913	25.7389	12.3122	7.7889	61.4407	2.32855
10	1998	Control	3	35.0059	12.0056	2.98412	13.9668	2.82298	23.9811	30.7602	15.998	49.9158	4.98038	43.4772	9.18082	4.58445	85.1856	10.2193	34.5262	0.24737	1.13389	3.75829	1.93549	32.5925	24.052	7.21481	49.338	1.94706	22.2354	0	1.97834	7.513	5.39925	24.5801	8.5165	6.8691	69.5812	3.46372
1	1998	Dactyladenia barteri	1	20.5633	10.8191	2.31988	8.5326	1.73932	39.4692	20.423	11.5006	36.4201	6.39753	18.8665	4.97311	2.8243	39.8278	5.6003	20.539	0.2012	0.722	2.60626	1.33533	33.476	24.4832	6.58346	44.3038	2.11716	20.3287	3.8895e-05	1.8147	7.0719	5.01921	29.2139	16.0355	7.713	65.6824	2.80269
6	1998	Dactyladenia barteri	2	16.2837	7.5822	1.65816	7.2014	1.36214	28.7336	24.7742	10.8013	40.9777	4.60331	6.7257	5.60693	2.88866	55.2474	7.0111	19.6644	0.20316	0.93949	3.04474	1.70715	30.4387	23.0286	5.77466	41.4238	1.88429	23.6909	0	1.69818	6.7654	5.27855	20.2893	9.7143	6.4339	60.5132	3.4289
11	1998	Dactyladenia barteri	3	12.79	7.3513	1.39722	6.3807	1.03389	41.4652	27.9058	13.7028	48.125	5.76693	27.3934	5.92673	3.83306	67.1892	8.2536	27.4553	0.20639	0.82205	3.00518	1.46804	35.063	25.2048	7.24815	48.8125	2.12936	14.3617	0	1.30996	5.2178	3.71176	15.9716	7.9965	4.8657	46.8302	2.32194
3	1998	Flemingia macrophylla	1	36.904	19.6412	4.24975	18.5863	3.29624	41.2756	30.0813	14.1653	55.1674	7.43069	22.5798	6.73413	4.19862	54.5954	8.8718	18.0069	0.15734	0.59305	2.18108	1.2163	28.6229	25.7827	8.16705	43.3932	2.28555	33.2893	5.3398e-05	2.55872	10.9136	7.25596	37.8811	18.117	11.0631	70.5076	3.32211
5	1998	Flemingia macrophylla	2	17.8587	9.1881	2.04658	6.9382	1.51911	58.1581	31.817	15.1905	55.3305	6.37776	19.625	5.49743	4.1503	48.3989	6.8492	27.9014	0.23365	1.10899	3.69424	1.9685	26.7847	24.5236	8.48827	38.5871	1.95898	24.4589	0	1.76175	6.8099	4.48878	24.9013	12.1923	8.0347	54.7073	2.60199
9	1998	Flemingia macrophylla	3	33.7861	12.1569	2.76262	11.7208	2.61733	52.354	38.1711	20.8839	57.4038	7.20756	28.079	5.53252	4.25377	50.6369	6.842	12.8922	0.10793	0.49978	1.67253	0.91818	26.7349	18.0846	6.77158	31.3131	1.65249	34.0518	0	2.04218	8.7564	5.56583	30.7271	15.4171	9.6116	64.5749	2.42957
4	1998	Senna spectabilis	1	28.0917	12.5734	2.92161	12.3977	2.11137	46.1573	30.067	13.7218	58.9265	8.25047	13.462	7.52645	3.9117	72.9368	10.9056	17.1835	0.14692	0.6068	2.11173	1.22808	26.7888	20.9295	7.29394	36.0276	2.16554	27.431	3.7267e-05	1.78576	7.6167	4.65695	36.1135	11.9113	7.1022	61.4362	3.30664
7	1998	Senna spectabilis	2	16.5458	10.2643	1.92639	10.9135	1.77617	43.6344	34.4293	12.4857	66.7096	8.17206	14.1566	6.1628	2.85349	28.8801	9.9035	11.3617	0.14974	0.65166	2.18035	1.30156	28.3095	19.0498	5.25518	41.6958	2.38366	29.0313	0	2.07721	8.6247	6.08245	29.7604	10.8171	5.3688	61.319	3.42918
12	1998	Senna spectabilis	3	14.8774	9.2588	1.62266	8.5696	1.24338	45.3424	31.4979	11.9229	60.874	6.72363	12.9786	6.34103	3.70419	70.2813	10.2592	20.849	0.22585	0.80561	2.7043	1.53296	41.7212	25.6902	9.01808	45.334	2.64882	25.8414	0	1.76451	7.2031	5.04752	30.5493	10.5061	5.7112	53.9189	3.10156
			LSD	ns	ns	ns	ns	ns	C < S & F	D < F	ns	D&C < S&F	C&D<S	ns	ns	ns	ns	D<S	ns	ns	ns	ns	ns	ns	ns	ns	ns	C&F<S	D<F	ns	ns	ns	ns	D<S	ns	S&D<F	ns	ns
			SNK	ns	ns	ns	ns	ns	C < F	ns	ns	D&C < S&F	ns	ns	ns	ns	ns	ns	ns	ns	ns	ns	ns	ns	ns	ns	ns	ns	ns	ns	ns	ns	ns	ns	ns	S&D<F	ns	ns
			Tukey	ns	ns	ns	ns	ns	C < F	ns	ns	D&C<S, D<F	ns	ns	ns	ns	ns	ns	ns	ns	ns	ns	ns	ns	ns	ns	ns	ns	ns	ns	ns	ns	ns	ns	ns	S&D<F	ns	ns
				Cassava	Cassava	Cassava	Cassava	Cassava	Cassava	Cassava	Cassava	Cassava	Cassava	Cassava	Cassava	Cassava	Cassava	Cassava	Groundnuts	Groundnuts	Groundnuts	Groundnuts	Groundnuts	Groundnuts	Groundnuts	Groundnuts	Groundnuts	Groundnuts	Maize	Maize	Maize	Maize	Maize	Maize	Maize	Maize	Maize	Maize
Plot	Year	Species	Rep	Leaf_N	Leaf_Ca	Leaf_Mg	Leaf_K	Leaf_P	Stem_N	Stem_Ca	Stem_Mg	Stem_K	Stem_P	Root_N	Root_Ca	Root_Mg	Root_K	Root_P	Grain_N	Grain_Ca	Grain_Mg	Grain_K	Grain_P	Straw_N	Straw_Ca	Straw_Mg	Straw_K	Straw_P	Grain_N	Grain_Ca	Grain_Mg	Grain_K	Grain_P	Straw_N	Straw_Ca	Straw_Mg	Straw_K	Straw_P
2	2001	Control	1	12.3776	8.1523	2.02006	8.089	1.341	3.68703	9.5738	5.54135	18.0077	1.17394	7.3417	6.0245	2.83383	40.5158	3.9306	46.2249	0.24161	1.36155	4.8072	2.31532	12.4176	13.4044	4.63836	24.9493	1.18988	19.9317	0.0678	2.63084	7.933	6.4928	13.5727	4.40392	3.90434	26.4699	2.65359
8	2001	Control	2	25.3003	9.6704	2.38989	11.222	2.06807	4.52764	11.592	5.62536	19.0312	1.11319	8.4059	7.20025	3.5315	53.2115	4.82455	39.6888	0.3084	1.47252	4.6171	2.62383	12.3368	15.5278	5.28609	28.2573	1.22443	13.6612	0.00732	1.51108	4.8257	3.9018	7.5222	2.98599	2.42657	16.6451	1.69074
10	2001	Control	3	15.7324	4.3787	1.24145	6.3756	1.43342	5.47107	10.8181	5.02712	18.0669	1.24656	13.1793	5.04424	2.83826	37.7659	3.95334	30.2393	0.23425	1.16292	4.1219	2.16971	13.9247	15.9129	5.50884	33.1642	1.40817	20.8664	0.01674	3.42852	11.0405	8.8984	16.9838	6.90283	5.77793	39.2751	3.89914
1	2001	Dactyladenia barteri	1	13.4185	7.8319	1.94299	8.3197	1.19678	5.99145	10.0345	5.21272	16.0931	1.25022	7.374	5.38648	2.87921	33.3317	3.61732	37.0533	1.12819	3.43488	13.2226	5.80189	11.1063	14.2148	4.78686	30.4059	1.16337	20.976	0.14442	3.22484	9.496	7.5031	17.6186	7.25891	5.2144	39.8232	3.68234
6	2001	Dactyladenia barteri	2	10.4532	5.479	1.47045	5.5694	0.83804	6.18671	9.4384	4.22175	17.1608	1.36157	6.5872	4.58027	2.418	42.2423	5.11182	33.4532	0.22515	1.57421	5.3006	2.82953	14.6913	20.8267	6.9868	39.138	1.67122	17.9304	0.01472	3.01385	9.327	7.7219	17.9969	6.62722	6.38823	48.8179	5.63035
11	2001	Dactyladenia barteri	3	9.5434	3.9915	1.21694	5.7106	0.81964	5.25834	13.0849	5.32693	20.5446	1.27349	4.4208	4.54846	2.16661	36.8028	4.15646	36.0273	0.99653	3.63867	11.7852	6.00674	9.6488	13.758	4.61399	27.2505	1.08224	27.5276	0.01765	3.16326	10.7329	8.5104	12.7068	5.29723	5.69193	37.6198	4.29917
3	2001	Flemingia macrophylla	1	17.6714	9.5093	2.13786	8.5826	1.46043	4.9028	13.0624	6.75745	13.2778	1.01989	7.0976	5.88333	3.35155	33.849	3.25634	44.3671	0.23424	1.41176	4.496	2.46022	11.3637	15.6448	6.12672	24.9725	1.22479	19.8662	0.07728	2.63879	7.8785	6.5284	13.6206	8.21562	5.53873	25.3744	1.85494
5	2001	Flemingia macrophylla	2	20.6094	11.1969	2.94182	10.9807	1.6948	6.56931	13.9909	6.84902	22.1556	1.50666	8.8061	6.33309	3.95888	46.3342	4.56145	22.3286	0.16146	0.96341	3.3259	1.66113	8.0466	10.9595	4.49095	17.6917	0.85079	24.7886	0.01709	2.90215	8.925	7.1924	23.9259	7.70909	6.91389	46.9916	3.70639
9	2001	Flemingia macrophylla	3	23.3952	8.6655	2.68111	8.7862	1.78374	8.08709	16.1753	8.78978	19.1926	1.35929	13.7158	5.8395	4.03225	42.5621	4.11846	50.4758	0.31008	1.42622	4.6422	2.45031	11.1826	12.5062	5.82384	23.7411	1.15765	11.4508	0.00774	1.11721	3.9084	2.8364	8.4817	2.76321	2.19978	17.1727	1.17747
4	2001	Senna spectabilis	1	12.0834	6.7994	1.61159	9.0182	1.26724	4.59107	10.5995	5.74124	19.4136	1.74276	8.7906	4.67205	2.68923	35.8956	4.7023	44.2132	0.22863	1.41933	4.549	2.62689	14.3785	15.6401	5.25324	28.4931	1.50571	25.4336	0.01484	2.34427	7.2428	6.1461	19.8628	6.97265	6.18131	43.898	6.77381
7	2001	Senna spectabilis	2	16.1685	9.7294	2.08255	11.221	1.54581	6.53109	20.2121	6.26446	33.3577	2.37497	7.3342	6.23544	3.20407	56.5915	5.88085	48.0615	0.37764	1.52347	5.5342	2.80437	13.5355	16.9528	4.46943	32.6451	1.4038	26.4446	0.01616	3.94489	11.4833	10.3767	18.5513	7.10654	5.83415	45.824	7.0573
12	2001	Senna spectabilis	3	14.0804	5.7107	1.45939	7.7906	1.17858	6.70419	12.2185	5.32659	27.535	2.0325	4.3596	3.91134	2.02713	38.5968	4.9041	18.7555	0.21551	1.0335	3.5499	1.88968	9.3373	11.668	3.51818	22.8343	1.02209	28.6441	0.01819	3.44499	10.9024	8.985	23.2796	6.99748	5.45938	49.5047	5.5418
			LSD	D<F	D<F	D&S<F	ns	D<C&F	ns	ns	D&C&S<F	D&C&F<S	C&D&F<S	ns	ns	D&S<F	ns	ns	ns	F&C&S<D	F&C&S<D	F&C&S<D	F&C&S<D	ns	ns	ns	ns	ns	ns	ns	ns	ns	ns	ns	ns	ns	ns	F<D&S, C<S
			SNK	ns	ns	ns	ns	D<C&F	ns	ns	D&C&S<F	ns	C&D&F<S	ns	ns	D&S<F	ns	ns	ns	ns	F&C&S<D	F&C&S<D	F&C&S<D	ns	ns	ns	ns	ns	ns	ns	ns	ns	ns	ns	ns	ns	ns	F&C<S
			Tukey	ns	ns	ns	ns	D<F	ns	ns	D&C<F	ns	C&D&F<S	ns	ns	D<F	ns	ns	ns	ns	F<D	F<D	F&C<D	ns	ns	ns	ns	ns	ns	ns	ns	ns	ns	ns	ns	ns	ns	F&C<S
				Cassava	Cassava	Cassava	Cassava	Cassava	Cassava	Cassava	Cassava	Cassava	Cassava	Cassava	Cassava	Cassava	Cassava	Cassava	Groundnuts	Groundnuts	Groundnuts	Groundnuts	Groundnuts	Groundnuts	Groundnuts	Groundnuts	Groundnuts	Groundnuts	Maize	Maize	Maize	Maize	Maize	Maize	Maize	Maize	Maize	Maize
Plot	Year	Species	Rep	Leaf_N	Leaf_Ca	Leaf_Mg	Leaf_K	Leaf_P	Stem_N	Stem_Ca	Stem_Mg	Stem_K	Stem_P	Root_N	Root_Ca	Root_Mg	Root_K	Root_P	Grain_N	Grain_Ca	Grain_Mg	Grain_K	Grain_P	Straw_N	Straw_Ca	Straw_Mg	Straw_K	Straw_P	Grain_N	Grain_Ca	Grain_Mg	Grain_K	Grain_P	Straw_N	Straw_Ca	Straw_Mg	Straw_K	Straw_P
2	2004	Control	1	16.9569	11.5468	3.291	4.0809	1.26386	10.7038	15.6272	7.6505	9.2802	1.55181	11.8752	3.24743	2.47271	17.1362	2.78253	29.5594	0.4636	1.21331	3.27165	2.21595	19.7521	17.7905	6.195	23.8488	1.1712	18.5455	0.07035	1.27096	4.27847	2.44492	12.1863	12.8737	4.5168	20.5666	0.80613
8	2004	Control	2	48.7306	48.4696	11.902	14.76	4.30586	11.2267	12.3445	5.9163	11.278	1.48	10.2918	3.5787	2.06765	14.1022	2.49293	39.9699	0.68353	1.62371	4.98059	3.01066	30.0139	30.2423	9.56692	31.1794	1.84928	26.7488	0.00262	1.74522	5.69381	3.29431	8.3205	9.0398	5.9673	29.2801	2.51362
10	2004	Control	3	17.9744	17.725	4.262	5.4874	1.49392	18.9649	25.6293	10.7429	18.0424	2.60475	17.6328	5.28882	3.47015	28.4124	3.8128	32.6511	0.48463	1.39756	4.04188	2.53757	21.668	20.5765	5.58742	32.665	1.51734	24.6278	0.16971	1.69068	5.57489	3.33031	13.5687	23.35	7.5071	41.0731	1.60447
1	2004	Dactyladenia barteri	1	24.9014	13.2007	3.4963	6.2707	2.03236	16.5746	24.0753	10.3344	12.9971	2.09623	16.9799	5.40019	3.89761	26.4257	3.80617	24.8649	0.46211	1.16454	3.30542	2.26909	25.9496	20.7839	6.50465	26.6943	1.72744	17.186	0.0018	1.15093	3.91464	2.16694	8.574	11.1628	5.1834	27.576	1.85828
6	2004	Dactyladenia barteri	2	14.1292	12.0926	3.1253	4.1924	1.18186	12.1917	17.8814	7.9739	13.8433	1.85884	14.5032	4.5961	3.04283	23.7274	4.19859	25.3067	0.41744	1.13348	3.18403	2.12234	29.0112	27.716	8.82055	32.1565	2.38358	18.053	0.07193	1.48297	4.51586	2.92319	10.4763	8.7041	4.9104	25.4102	1.91392
11	2004	Dactyladenia barteri	3	10.9668	9.5003	1.95	3.5999	0.96725	10.3523	13.4663	5.4274	11.7681	1.78374	6.5131	1.98742	1.29954	13.9827	2.66119	51.0583	0.80852	2.12261	5.8913	3.9491	24.4871	28.4178	8.73417	42.1946	1.84812	22.267	0.00239	1.64285	5.36357	3.17158	25.272	12.402	6.518	30.5648	2.14538
3	2004	Flemingia macrophylla	1	17.5628	13.954	4.3891	4.402	1.50436	13.8695	19.4965	8.5622	11.7194	2.08976	16.0352	4.89968	3.26359	22.7886	3.78231	18.5145	0.2728	0.77287	2.18693	1.50163	16.3734	12.2606	4.0711	18.1603	1.04522	22.3802	0.08403	1.55117	4.94547	3.01954	12.7161	7.2398	5.2761	32.2993	1.88357
5	2004	Flemingia macrophylla	2	18.2431	13.8565	4.2287	4.0014	1.46109	14.5152	16.411	7.9003	11.6234	1.94241	20.1403	5.16996	4.38256	21.3758	4.14344	25.9401	0.39818	1.05043	3.31368	1.93805	21.7335	21.1497	7.55196	31.4843	1.58792	23.7487	0.08565	1.5978	5.04053	3.0944	21.8809	15.7111	7.5189	36.9944	1.71386
9	2004	Flemingia macrophylla	3	29.0554	18.5581	5.6522	8.2429	2.41487	12.4637	13.634	7.1564	11.9498	1.76459	15.6232	4.28386	3.4514	20.4986	3.52531	18.5093	0.29583	0.87387	2.63575	1.64687	12.0886	11.8875	4.02757	18.9555	0.99307	28.8057	0.19657	1.91908	6.26102	3.72036	9.5925	5.8425	4.3775	27.4383	1.64683
4	2004	Senna spectabilis	1	17.0372	13.7589	2.887	6.2617	1.72769	16.0764	18.7818	7.8761	17.021	2.14873	8.7437	2.61364	1.8469	21.2022	4.18337	22.0379	0.39805	0.87437	2.6714	1.72941	12.9241	14.9579	3.54488	20.4915	1.11554	27.903	0.09934	1.95081	6.2373	3.82323	12.016	10.1259	6.0078	40.2772	5.92586
7	2004	Senna spectabilis	2	20.3389	17.8947	4.6252	6.2469	1.91185	14.8098	20.4097	8.453	19.6939	2.53884	15.103	4.95316	3.21193	26.3857	5.51438	27.533	0.57867	1.13265	3.55287	2.32475	29.145	29.3973	7.54135	40.0509	2.35234	26.5805	0.19146	1.90734	6.28931	3.60462	18.7186	12.6516	6.6357	42.7396	3.56134
12	2004	Senna spectabilis	3	16.5214	21.698	3.8621	6.1395	1.72167	20.3295	23.1066	9.7537	21.7835	3.55184	12.8435	4.33574	2.62828	23.8946	5.13282	37.8708	0.58243	1.47536	4.27641	2.83234	23.2754	22.4445	5.35862	37.3862	1.91737	36.7769	0.12805	2.61507	8.54336	5.17918	46.386	41.0987	10.4898	77.0983	3.58973
			LSD	ns	ns	ns	ns	ns	ns	ns	ns	F&C&D<S	ns	ns	ns	ns	ns	C&D<S	ns	ns	ns	ns	ns	ns	ns	ns	ns	ns	D<S	ns	D&C<S	D&C<S	D&C<S	ns	ns	ns	D&C<S	C&F&D<S
			SNK	ns	ns	ns	ns	ns	ns	ns	ns	F&C&D<S	ns	ns	ns	ns	ns	C<S	ns	ns	ns	ns	ns	ns	ns	ns	ns	ns	D<S	ns	ns	D<S	ns	ns	ns	ns	ns	C&F&D<S
			Tukey	ns	ns	ns	ns	ns	ns	ns	ns	F<S	ns	ns	ns	ns	ns	C<S	ns	ns	ns	ns	ns	ns	ns	ns	ns	ns	D<S	ns	ns	D<S	ns	ns	ns	ns	ns	C&F&D<S
		Abbreviations		Cassava
				Leaf_	amount of element in green leaves and branches
				Cassava
				Stem_	amount of element in the lignified and suitable for propagation stems
				Cassava
				Root_	amount of element in the tuberous roots
				Groundnuts
				Grain_	amount of element in the grains without pods
				Groundnuts
				Straw_	amount of element in the straw and the empty pods
				Maize
				Grain_	amount of element in grain only
				Maize
				Straw_	amount of element in straw, husks and empty cobs
				LSD	Least Significant Difference
				SNK	Student Newman Keuls
				Tukey	Tukey's Honest Significant Difference
				C	Control
				D	Dactyladenia barteri
				F	Flemingia macrophylla
				S	Senna spectabilis
